# Supplementary material
Source: HighWire-hosted journal article supplement (http://www.cmaj.ca/highwire/filestream/72866/field_highwire_adjunct_files/0/180717-res-1-at.pdf)
Supplement: 180717-res-1-at.pdf [file 180717-res-1-at.pdf]

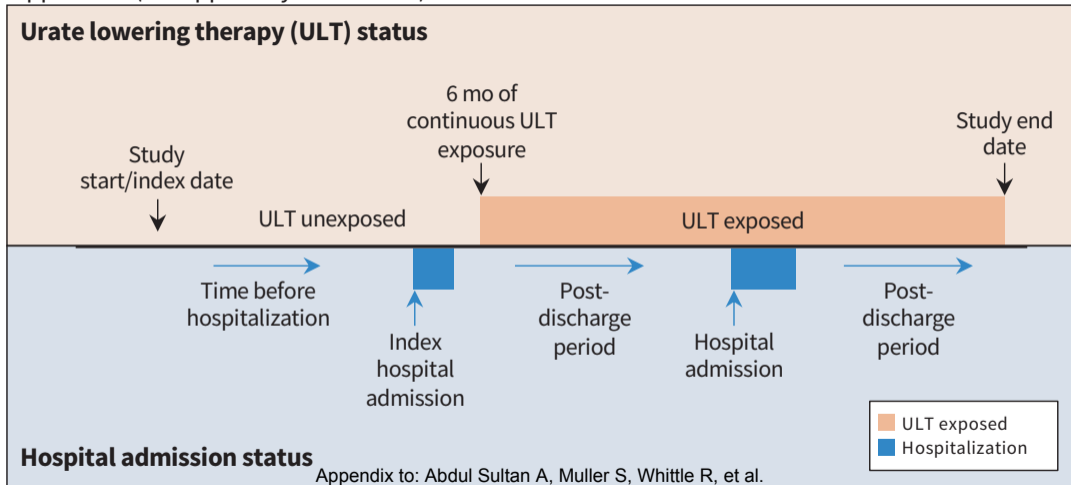

Appendix to: Abdul Sultan A, Muller S, Whittle R, et al.
